# Supplementary material
Source: PubMed Central journal article supplement (PMC4878053)
Supplement: supp_JCO.2012.44.6823_Supplementary_Material_JCO.2012.44.6823.pdf [file supp_JCO.2012.44.6823_Supplementary_Material_JCO.2012.44.6823.pdf]

# Randomized Open-Label Phase II Study of Decitabine in Patients With Low- or Intermediate-Risk Myelodysplastic Syndromes

Guillermo Garcia-Manero, MD, et al.

## SUPPLEMENTARY MATERIAL

### METHODS: SAMPLE SIZE AND STATISTICAL POWER CONSIDERATIONS

A maximum of 80 patients could be randomized and treated on this study. Approximately 5000 simulations per scenario were used to evaluate the performance of the adaptive randomization procedure of the Bayesian design under several different scenarios, as shown in Table S1. There was 80% power to select a superior schedule if the overall improvement rates were 10% and 30%, respectively. There was approximately 41% power to select a superior schedule if the overall improvement rates were 20% and 30%, respectively. When both treatment arms had a 10% overall improvement rate, the probability (Pr) for each one to be selected was about 19%, which is equivalent to the Type I error of a frequentist design.

**Table S1: Operating Characteristics of Adaptive Randomization**

|                          | <b>Schedule A</b> | <b>Schedule B</b> |
|--------------------------|-------------------|-------------------|
| OIR                      | 0.10              | 0.10              |
| Expected no. of patients | 34                | 35                |
| Pr (select)              | 0.094             | 0.095             |
| Pr (select early)        | 0.094             | 0.095             |
| Pr (stop early)          | 0.21              | 0.21              |
|                          |                   |                   |
| OIR                      | 0.05              | 0.20              |
| Expected no. of patients | 26                | 51                |
| Pr (select)              | 0.002             | 0.69              |
| Pr (select early)        | 0.002             | 0.68              |
| Pr (stop early)          | 0.79              | 0.02              |
|                          |                   |                   |
| OIR                      | 0.1               | 0.2               |
| Expected no. of patients | 30                | 47                |
| Pr (select)              | 0.01              | 0.47              |

|                          |        |       |
|--------------------------|--------|-------|
| Pr (select early)        | 0.01   | 0.46  |
| Pr (stop early)          | 0.50   | 0.03  |
| OIR                      | 0.20   | 0.20  |
| Expected no. of patients | 37     | 37    |
| Pr (select)              | 0.12   | 0.14  |
| Pr (select early)        | 0.11   | 0.14  |
| Pr (stop early)          | 0.14   | 0.12  |
| OIR                      | 0.20   | 0.30  |
| Expected no. of patients | 32     | 47    |
| Pr (select)              | 0.02   | 0.42  |
| Pr (select early)        | 0.02   | 0.41  |
| Pr (stop early)          | 0.42   | 0.03  |
| OIR                      | 0.10   | 0.30  |
| Expected no. of patients | 25     | 54    |
| Pr (select)              | 0.0008 | 0.80  |
| Pr (select early)        | 0.0008 | 0.80  |
| Pr (stop early)          | 0.81   | 0.002 |

OIR, overall improvement rate; Pr, probability.

Based on previous studies, an overall improvement rate (OIR) of about 20% was expected in both arms. Therefore, it was assumed that OIR had a prior beta distribution (0.4, 1.6) with mean 0.20. OIR<sub>a</sub> and OIR<sub>b</sub> denoted the overall improvement rates for Schedule A and Schedule B, respectively. Beginning with the 21st patient in each arm and for each subsequent patient, OIR<sub>a</sub> was compared with OIR<sub>b</sub>, incorporating available data from all patients with evaluable responses. To avoid favoring one arm earlier in a large study, rather than assigning patients with posterior probability ( $P_a = \Pr[\text{OIR}_a > \text{OIR}_b | \text{data}]$  and  $P_b = 1 - P_a$ ), the following formula was used to assign patients:

$$A_a = \frac{\sqrt{P_a}}{(\sqrt{P_a} + \sqrt{P_b})}, \quad A_b = 1 - A_a,$$

wherein  $A_a$  denotes the probability of assigning patients to Schedule A,  $A_b$  denotes the probability of assigning patients to Schedule B,  $P_a$  is the posterior probability that

Schedule A is superior to Schedule B, and  $P_b$  is the posterior probability that Schedule B is superior to Schedule A.

If at any point during the study  $\Pr(\text{OIR}_a > \text{OIR}_b | \text{data}) > 0.95$  (or  $< 0.05$ ), then Schedule A (or B) was selected as superior. If accruing information gave strong evidence that an OIR of 10% or greater was unlikely to be true for any treatment arm ( $\Pr[\text{OIR}_a > 0.1 | \text{data}] < 0.05$ , or,  $\Pr[\text{OIR}_b > 0.1 | \text{data}] < 0.05$ ), assignment to that arm was stopped. If the maximum of 80 patients were enrolled and evaluated (the last patient had been on treatment for 3 cycles) and  $\Pr(\text{OIR}_a > \text{OIR}_b | \text{data}) > 0.95$  (or  $< 0.05$ ), it was declared that Schedule A (or B) had a higher OR rate than schedule B (or A). Otherwise, the study would be considered inconclusive.

At each subsequent decision point for the calculation of posterior probability of  $P_a$  or  $P_b$ , patients with confirmed objective responses (complete response [CR], marrow CR [mCR], partial response [PR], or hematologic improvement [HI]) were considered successes and patients with progressive disease [PD] were considered failures. For patients who had only stable disease (SD), Markov Chain Monte Carlo draws using standard techniques ( $M=100,000$ ) were adopted for the estimation.

### **METHODS: DNA Methylation and miR-29b Analysis**

DNA methylation was performed as previously described.<sup>1</sup> DNA was extracted using standard phenol-chloroform methods and was modified with sodium bisulfite. Both global and gene-specific assays of DNA methylation were performed. For global DNA methylation, the long interspersed nuclear element (LINE) assay using bisulfite pyrosequencing was used.<sup>1</sup> Gene-specific analyses were conducted on *p15*, *CSDA*, *ZNF582*, *ER*, and *PGRB* using pyrosequencing techniques (Table S2).<sup>2-4</sup>

For miR29b analysis, total cellular ribonucleic acid (RNA) was extracted with Trizol (Invitrogen; Carlsbad, CA). TaqMan MicroRNA reverse transcription kit (Applied Biosystems; Austin, TX) was used for reverse transcription reactions. For real-time PCR analysis, miR-29b TaqMan MicroRNA assays were purchased from Applied Biosystems and analyzed with TaqMan Universal PCR Master Mix (Applied Biosystems, Carlsbad, CA) with an Applied Biosystems Prism 7500 sequencing detection system. The U6 small nuclear RNA was used as internal control.<sup>1</sup>

**TABLE S2. Primer Sequences Used for Pyrosequencing**

| Gene                   | Forward Primer                           | Reverse Primer                                                   | Biotin Primer                      | Sequencing Primer                |
|------------------------|------------------------------------------|------------------------------------------------------------------|------------------------------------|----------------------------------|
| <i>LINE</i>            | 5-TTTTGAGTT<br>AGGTGTGG<br>GATATA-3      | 5-AAAATCAA<br>AAAATTCCC<br>TTTC-3                                | 5- AAAATCAA<br>AAAATTCCC<br>TTTC-3 | 5-AGTTAGGTGT<br>GGGATATAGT-3     |
| <i>CSDA</i>            | 5- GGAGTAGGG<br>TTTTGGATTT<br>TTATTAGT-3 | 5-GGGACACCGC<br>TGATCGTTTA<br>TTCACCCTAACTTT<br>CCTTAATTCTACAA-3 | 5-GGGACACCGC<br>TGATCGTTTA-3       | 5-GGATTTTTTATTA<br>GTATTTAAAGG-3 |
| <i>P15</i>             | 5-GTTTTTTTTT<br>AGAAGTAA<br>TTTAGG-3     | 5-TCCTTCTA<br>CRACTTAA<br>AACC -3                                | 5-TCCTTCTA<br>CRACTTAA<br>AACC-3   | 5- TTTTITAGAA<br>GTAATTTAGG-3    |
| <i>ER</i>              | 5-GGGAGGAA<br>TAGGAGTAG<br>GAGATTTTA-3   | 5-GGGACACCGC<br>TGATCGTTTA<br>CCCCCTCAAC<br>AAAAACAACACTAAAA-3   | 5-GGGACACCGC<br>TGATCGTTTA-3       | 5-TTGGGTT<br>TAGGTTA-3           |
| <i>ZNF582</i>          | 5-GGGTATTAGTT<br>TTTGTTGGAT<br>TTTAGAG-3 | 5- GGGACACCGC<br>TGATCGTTTA<br>TAAAAACCCCC<br>CCTAAACTACC-3      | 5-GGGACACCGC<br>TGATCGTTTA-3       | 5-TTTTTTAGGGTTT<br>AAGTGTTAT-3   |
| <i>PGBR<br/>(PCR1)</i> | 5-<br>TGTGGGTGGTAT<br>TTTTAATGAGA-3      | 5-CCCCCTCACTAA<br>AACCCCTAAA-3                                   |                                    |                                  |
| <i>PGBR<br/>(PCR2)</i> | 5-GAGAATTAG<br>TTTTATTTG<br>TTATTT-3     | 5- GGGACACCGC<br>TGATCGTTTA<br>CAACCCATTCCC<br>AAAAAAAATC-3      | 5-<br>GGGACACCGC<br>TGATCGTTTA-3   | 5- GGGATTT<br>GAGATTTT-3         |

NOTE: R indicates G or A.

## RESULTS: DNA Methylation

As an exploratory analysis, global and gene-specific promoter DNA methylation were analyzed in 17 patients (Schedule A, n=9; Schedule B, n=8) using available samples. Methylation was analyzed on study days 0, 8, 15, and 22 of the first cycle of therapy. When LINE methylation data from patients on both schedules were pooled, no global hypomethylation effect was observed (Figure S1). Comparing LINE methylation by schedule, there was a trend toward induction of LINE hypomethylation on day 8 compared with baseline in patients on Schedule A but not in those on Schedule B (Figure S2). However, the small sample size does not allow any conclusions to be drawn. No correlation with clinical outcome was feasible.

Analyses were also conducted on levels of promoter methylation of 5 genes (*p15*, *CSDA*, *ZNF582*, *ER*, *PGRB*) reported to be methylated in MDS.<sup>5,6</sup> Only a decrease in promoter methylation of *PGRB* was observed (n=14; Figure S3).

Because miR29b has been associated with response to decitabine treatment,<sup>7</sup> miR29b levels were measured at baseline. Of 15 patients with available data, only 2 (13%) achieved a response. One patient had a high level of miR29b, and the other had an undetectable level. In general, baseline levels of miR29b were low in most patients (Figure S4).

**FIGURE S1. Mean  $\pm$  standard deviation of *LINE* methylation measured in 17 patients sequentially during the first cycle of decitabine therapy.**

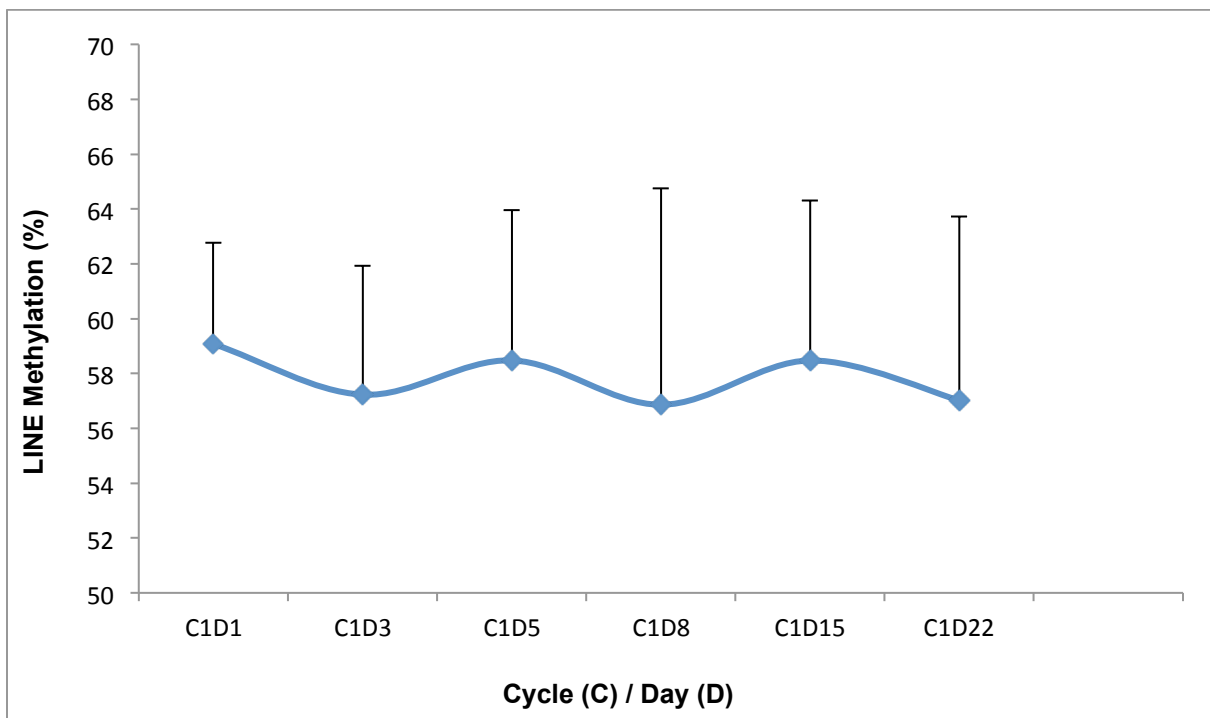

**Figure S2. Sequential analysis DNA methylation during cycle 1 of therapy using LINE methylation (mean  $\pm$  standard deviation). Schedule A: n=9; Schedule B: n=8.**

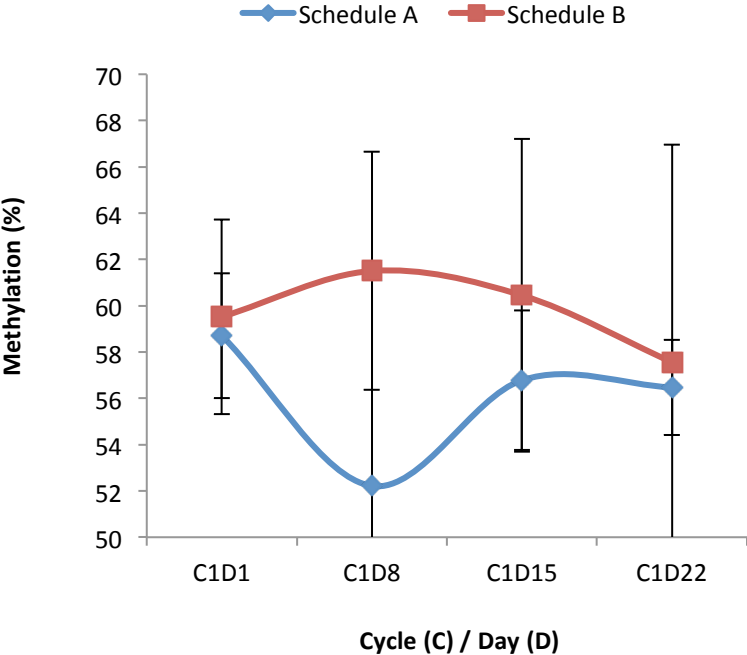

**FIGURE S3. Mean  $\pm$  standard deviation of promoter methylation of *PGRB* measured in 14 patients sequentially during the first cycle of decitabine therapy.**

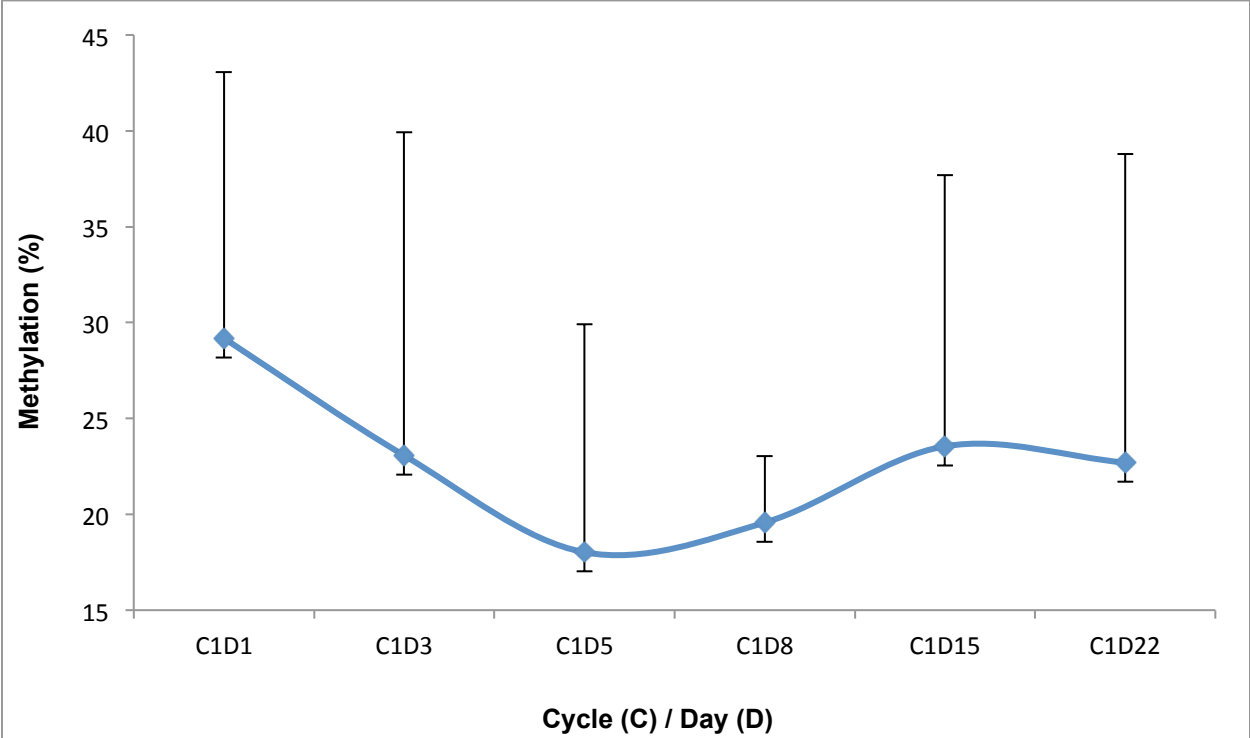

**FIGURE S4. miR29b levels were analyzed in 15 patients at baseline by real-time PCR as described and are reported as expression levels. Bars represent mean  $\pm$  standard error. Each symbol represents 1 patient. In 4 patients, expression levels were undetectable. There was no clear association between miR29b levels and response.**

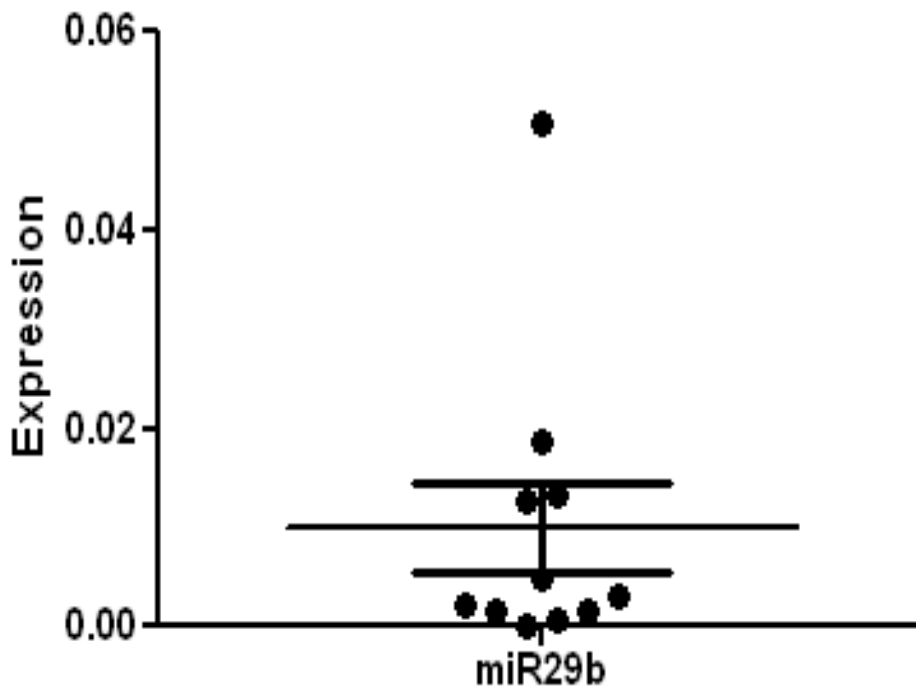

Patients Analyzed for miR29b Expression Level



## REFERENCES

1. Garcia-Manero G, Kantarjian HM, Sanchez-Gonzalez B, et al: Phase 1/2 study of the combination of 5-aza-2'-deoxycytidine with valproic acid in patients with leukemia. *Blood* 108:3271-9, 2006
2. Kuang SQ, Bai H, Fang ZH, et al: Aberrant DNA methylation and epigenetic inactivation of Eph receptor tyrosine kinases and ephrin ligands in acute lymphoblastic leukemia. *Blood* 115:2412-9, 2010
3. Kuang SQ, Tong WG, Yang H, et al: Genome-wide identification of aberrantly methylated promoter associated CpG islands in acute lymphocytic leukemia. *Leukemia* 22:1529-38, 2008
4. Shu J, Jelinek J, Chang H, et al: Silencing of bidirectional promoters by DNA methylation in tumorigenesis. *Cancer Res* 66:5077-84, 2006
5. Figueroa ME, Lugthart S, Li Y, et al: DNA methylation signatures identify biologically distinct subtypes in acute myeloid leukemia. *Cancer Cell* 17:13-27, 2010
6. Shen L, Kantarjian H, Guo Y, et al: DNA methylation predicts survival and response to therapy in patients with myelodysplastic syndromes. *J Clin Oncol* 28:605-13, 2010
7. Blum W, Garzon R, Klisovic RB, et al: Clinical response and miR-29b predictive significance in older AML patients treated with a 10-day schedule of decitabine. *Proc Natl Acad Sci U S A* 107:7473-8, 2010
